# Supplementary material for: Fluorescent chemosensing for aromatic compounds by a supramolecular complex composed of tin(iv) porphyrin, viologen, and cucurbit[8]uril
Source: Royal Society of Chemistry journal article supplement (doi:10.1039/c9cc05622j), 2019-01-01
Supplement: c9cc05622j1.pdf [file c9cc05622j1.pdf]

## Supplementary Information

### **Fluorescent chemosensing for aromatic compounds by supramolecular complex composed of tin(IV) porphyrin, viologen, and cucurbit[8]uril**

Nirmal Kumar Shee, Min Kyoung Kim and Hee-Joon Kim\*

*Department of Applied Chemistry, Kumoh National Institute of Technology,*

*Gumi 39177, Republic of Korea*

## Experimental Section

All operations were carried out using standard Schlenk line techniques under nitrogen atmosphere.  $^1\text{H}$  NMR spectra were obtained on a Bruker BIOSPIN/AVANCE III 400 spectrometer. Fluorescence spectra were recorded on a Shimadzu PF-5300PC spectrophotometer. ESI mass spectra were recorded on a Thermo Finnigan Linear Ion Trap Quadrupole mass spectrometer.

### ***meso*-Tetrakis[4-(2-(2-(2-methoxyethoxy)ethoxy)ethoxy)phenyl]porphyrin**

To a solution containing [2-[2-(2-methoxyethoxy)ethoxy]ethoxy]*p*-toluenesulfonate (0.14 g, 0.50 mmol) and *meso*-tetrakis(4-hydroxyphenyl)porphyrin (0.10 g, 0.15 mmol) in DMF (30 mL),  $\text{K}_2\text{CO}_3$  (0.17 g, 1.25 mmol) was added. The reaction mixture was heated at reflux for 24h. After the solvent was removed in vacuo, the product was separated and purified by column chromatography using an eluent of  $\text{CH}_2\text{Cl}_2$  on silica gel. Yield: 0.18 g (93 %).  $^1\text{H}$  NMR (400 MHz,  $\text{CDCl}_3$ ):  $\delta$  8.87 (s, 8H), 8.16 (d, 8H), 7.29 (d, 8H), 4.25 (t, 8H), 3.91 (t, 8H), 3.73 (t, 8H), 3.66 (t, 8H), 3.58 (t, 8H), 3.46 (t, 8H), 3.29 (s, 12H), -2.90 (s, 2H) ppm.

***trans*-Dichloro[tetrakis{4-(2-(2-(2-methoxyethoxy)ethoxy)ethoxy)phenyl}porphyrinato]tin(IV):** To a solution of tetrakis[4-(2-(2-(2-methoxyethoxy)ethoxy)ethoxy)phenyl] porphyrin (0.10 g, 0.79 mmol) in 50 mL pyridine, anhydrous tin(II) chloride (200 mg, 1.05 mmol) was added. After refluxing for 7 hours, the solution was filtered through a celite pad. The product was recrystallized from  $\text{CH}_2\text{Cl}_2/n$ -hexane. Yield: 0.09 g (78 %).  $^1\text{H}$  NMR (400 MHz,  $\text{DMSO}-d_6$ ):  $\delta$  3.28 (s, 12H), 3.50 (m, 8H), 3.60 (m, 8H), 3.65 (m, 8H), 3.73 (m, 8H), 3.95 (t, 8H), 4.44 (t, 8H), 7.49 (d, 8H), 8.21 (d, 8H), 9.28 (s, 8H) ppm.

### ***trans*-Dihydroxo[tetrakis{4-(2-(2-(2-methoxyethoxy)ethoxy)ethoxy)phenyl}porphyrinato]tin(IV):**

To a solution of (por)SnCl<sub>2</sub> (0.2 g, 0.13 mmol) in 100 mL of THF, a solution of  $\text{K}_2\text{CO}_3$  (0.325 g, 2.21 mmol) in distilled water (30 mL) was added. After refluxing for 3 hours, the solvent was evaporated and the residue was carried on the extraction using  $\text{CH}_2\text{Cl}_2$ /water. The organic layers were then combined, dried over anhydrous  $\text{MgSO}_4$ , and filtered. The solvent was evaporated under reduced pressure and the product was recrystallized from  $\text{CH}_2\text{Cl}_2/n$ -hexane. Yield: 0.14 g (72 %).  $^1\text{H}$  NMR (400 MHz,  $\text{DMSO}-d_6$ ):  $\delta$  3.28 (s, 12H), 3.50 (m, 8H), 3.61 (m, 8H), 3.65 (m, 8H), 3.73 (m, 8H), 3.95 (t, 8H), 4.43 (t, 8H), 7.46 (d, 8H), 8.18 (d, 8H), 9.05 (s, 8H) ppm.

***trans*-Bis(1-(4-Carboxybenzyl)-1'-methyl-4,4'-bipyridinium)[tetrakis{4-(2-(2-(2-methoxyethoxy)ethoxy)ethoxy)phenyl}porphyrinato]tin(IV) hexafluorophosphate (1):** To a solution of (por)Sn(OH)<sub>2</sub> (0.05 g, 0.04 mmol) in 40 mL of THF, 1-(4-carboxybenzyl)-4,4'-bipyridinium

hexafluorophosphate (0.05 g, 0.08 mmol) was added. After refluxing for 48 h, the solvent was evaporated under reduced pressure. The residue was recrystallized from THF/*n*-hexane to produce **1**. Yield: 0.07 g (80 %).  $^1\text{H NMR}$  (400 MHz,  $\text{DMSO-}d_6$ ):  $\delta$  3.28 (s, 12H), 3.50 (m, 8H), 3.61 (m, 8H), 3.65 (m, 8H), 3.73 (m, 8H), 3.95 (t, 8H), 4.37 (s, 6H), 4.43 (t, 8H), 4.76 (s, 4H), 5.42 (d, 4H), 6.61 (d, 4H), 7.95 (m, 16H), 8.16 (d, 4H), 8.52 (d, 4H), 8.54 (d, 4H), 9.02 (d, 4H), 9.22 (s, 8H) ppm.

**1:2 Supramolecular complex of 1 and cucurbit[8]uril (1•CB[8]):**  $^1\text{H NMR}$  (400 MHz,  $\text{DMSO-}d_6$ ):  $\delta$  3.28 (s, 12H), 3.50 (m, 8H), 3.61 (m, 8H), 3.65 (m, 8H), 3.73 (m, 8H), 3.95 (t, 8H), 4.21 (d, 32H, CB[8]), 4.43 (t, 8H), 4.53 (s, 6H), 5.39 (s, 32H, CB[8]), 5.58 (d, 32H, CB[8]), 6.08 (s, 4H), 6.99 (d, 4H), 7.08 (d, 4H), 7.30 (d, 4H), 7.97 (m, 8H), 8.12 (d, 8H), 8.31 (d, 4H), 8.91 (d, 4H), 8.96 (d, 4H), 9.25 (s, 8H) ppm.

**Scheme S1.** A series of reactions for the synthesis of **1**.

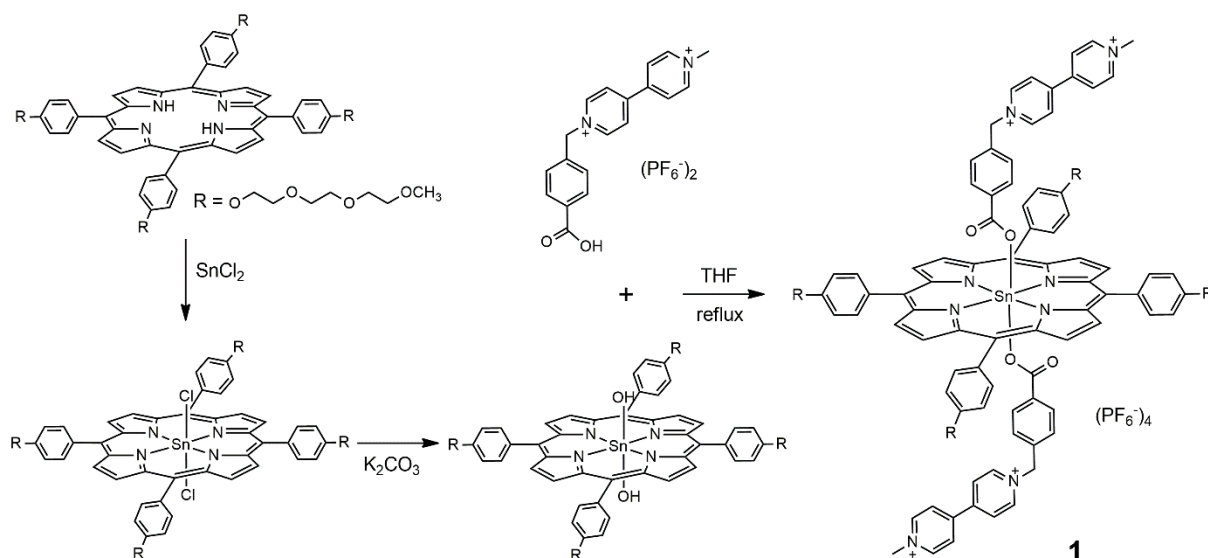

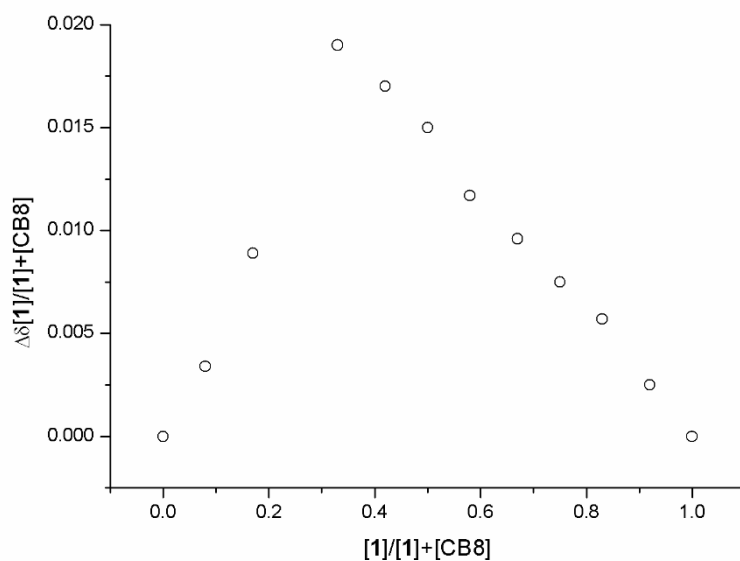

**Fig. S1** Job's plot of **1** ( $c = 2 \text{ mM}$ ) with CB[8] in DMSO- $d_6$ . Considering  $\Delta\delta (= \delta_{\text{free}} - \delta_{\text{complex}})$  of  $\alpha$  protons from the N-CH<sub>3</sub> end of bipyridinium moiety of **1**. Showing the maximum  $\Delta\delta$  at  $\sim 0.33$ .

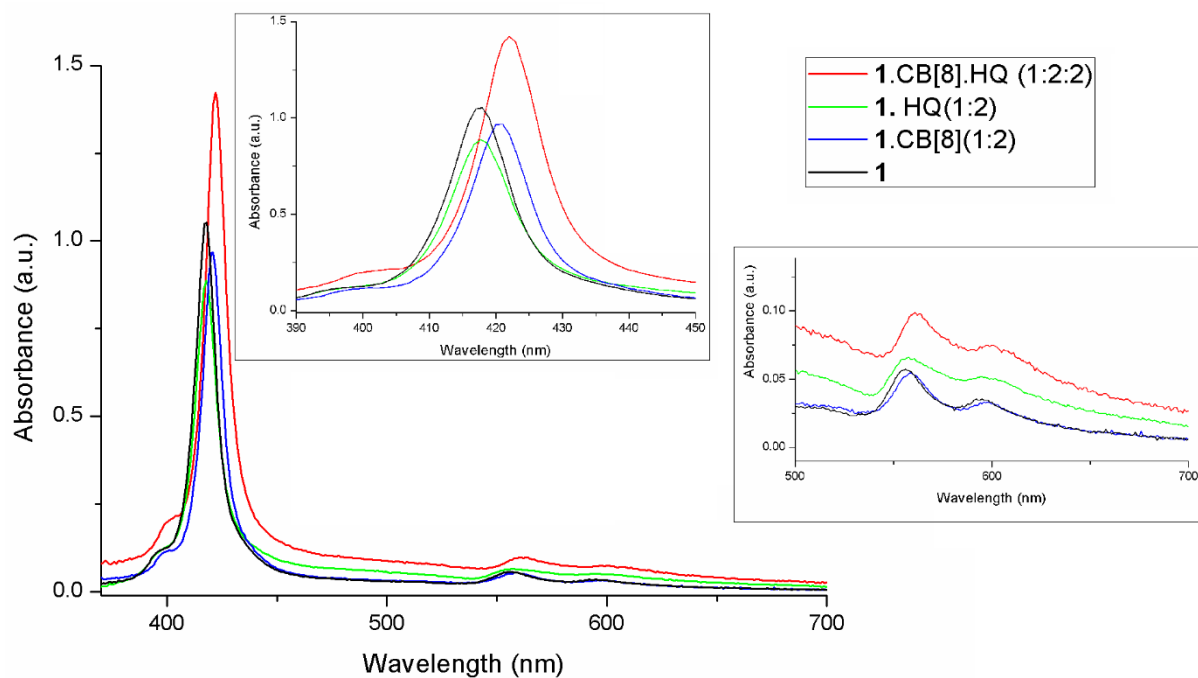

**Fig. S2** Absorption spectra of **1**, CB[8], and HQ in water. All spectra were recorded with  $2 \mu\text{M}$  solutions.

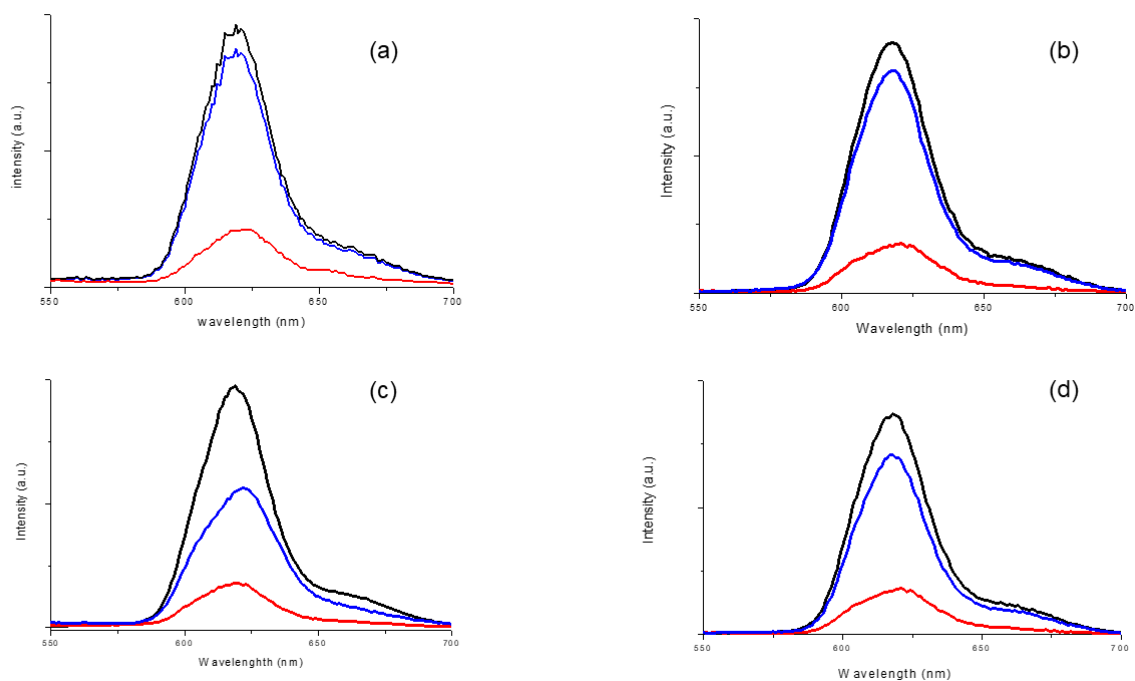

**Fig. S3** Fluorescence spectral changes for **1** in aqueous solutions ( $c = 2 \mu\text{M}$ , using sodium phosphate buffer at pH 7.0) upon the supramolecular complexation. Each black and red curve correspond to **1** itself and the complexation with 2 equivalents of CB[8], respectively. The blue curves depict in the additional presence of 2 equivalent aromatic compounds; (a) 2,6-dihydroxynaphthalene, (b) tyrosine, (c) tryptophan, and (d) dopamine. The fluorescence was yielded by the excitation at 422 nm.

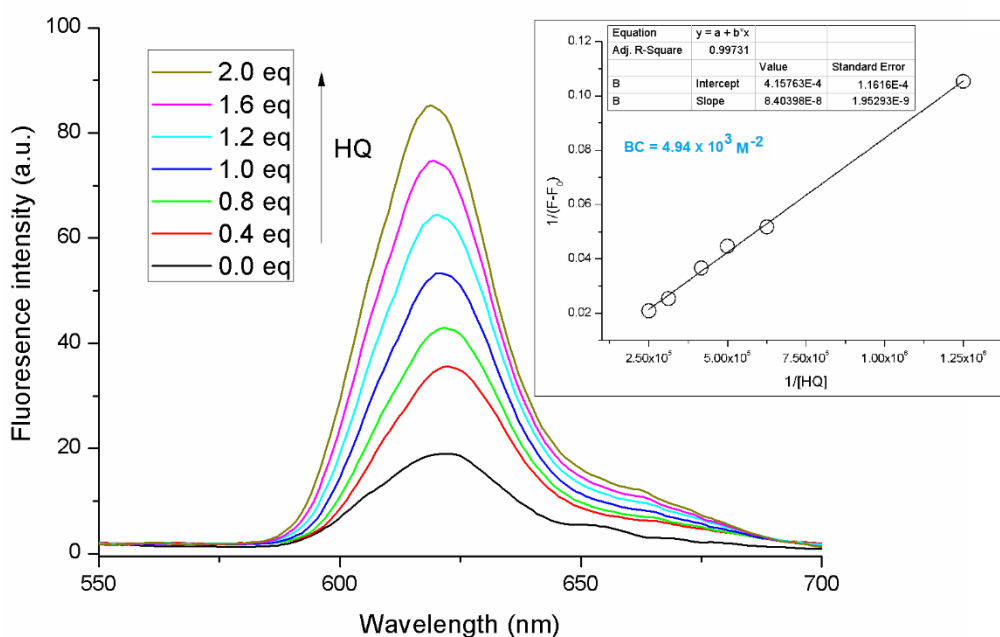

**Fig. S4** Fluorescence titration experiment of 1•CB[8] ( $c = 2 \mu\text{M}$ , using sodium phosphate buffer at pH 7.0) and hydroquinone in water ( $\lambda_{\text{ex}} = 422 \text{ nm}$ ). The inset shows the linear fitting curve.

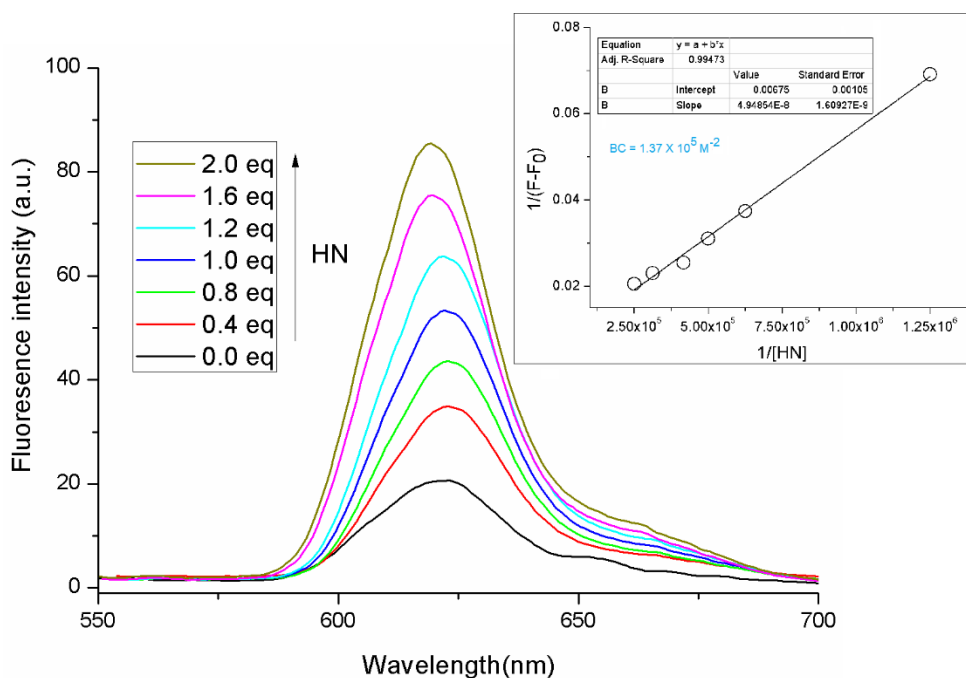

**Fig. S5** Fluorescence titration experiment of 1•CB[8] ( $c = 2 \mu\text{M}$ , using sodium phosphate buffer at pH 7.0) and 2,6-dihydroxynaphthalene in water ( $\lambda_{\text{ex}} = 422 \text{ nm}$ ). The inset shows the linear fitting curve.

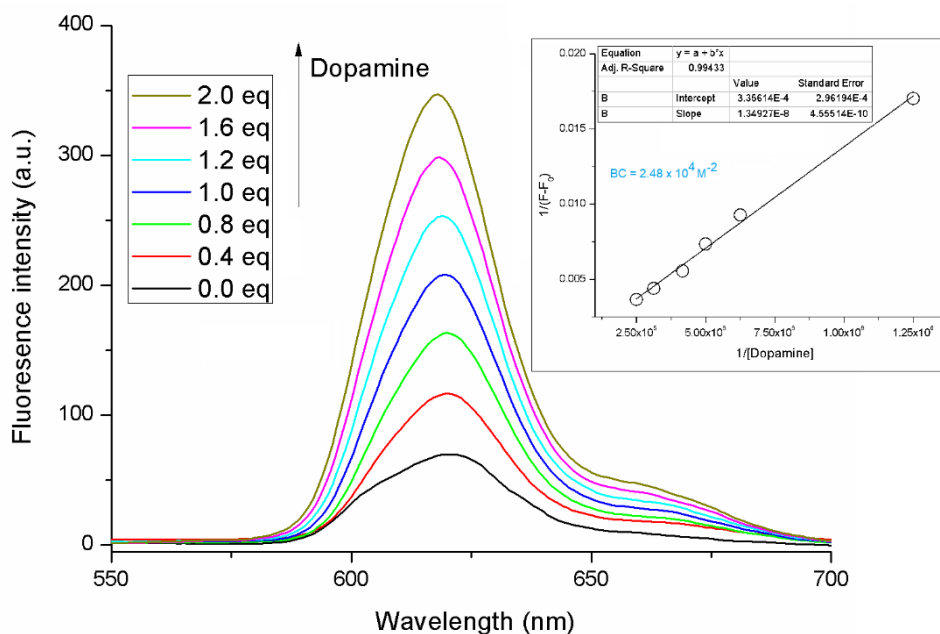

**Fig. S6** Fluorescence titration experiment of  $1\bullet\text{CB}[8]$  ( $c = 2 \mu\text{M}$ , using sodium phosphate buffer at pH 7.0) and dopamine in water ( $\lambda_{\text{ex}} = 422 \text{ nm}$ ). The inset shows the linear fitting curve.

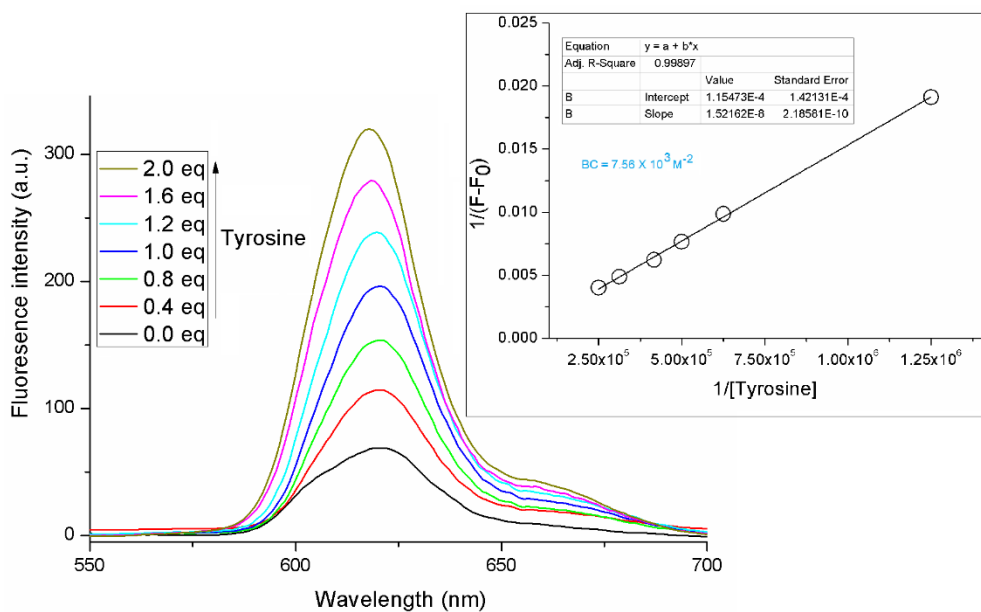

**Fig. S7** Fluorescence titration experiment of  $1\bullet\text{CB}[8]$  ( $c = 2 \mu\text{M}$ , using sodium phosphate buffer at pH 7.0) and tyrosine in water ( $\lambda_{\text{ex}} = 422 \text{ nm}$ ). The inset shows the linear fitting curve.

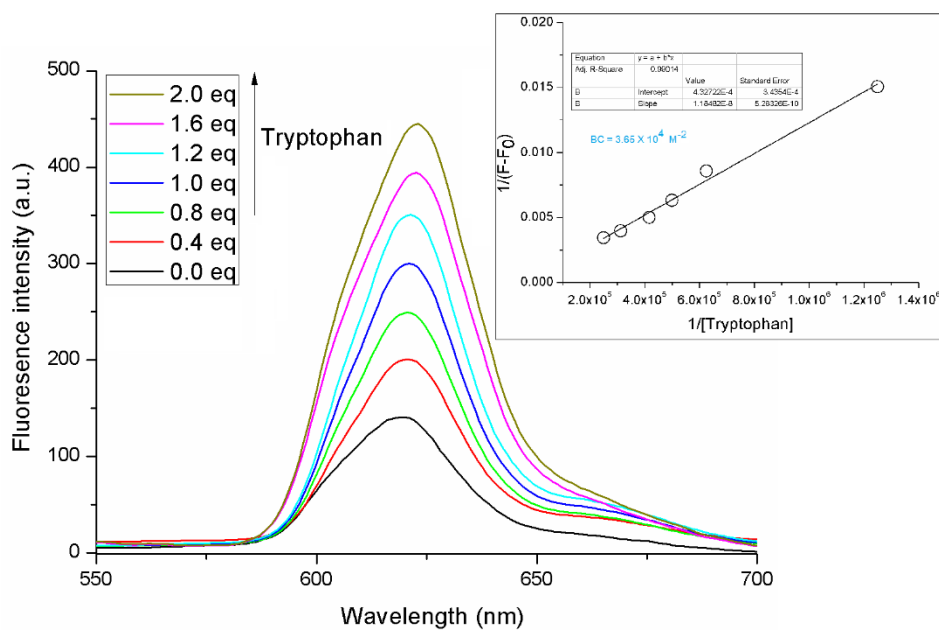

**Fig. S8** Fluorescence titration experiment of **1**•CB[8] ( $c = 2 \mu\text{M}$ , using sodium phosphate buffer at pH 7.0) and tryptophan in water ( $\lambda_{\text{ex}} = 422 \text{ nm}$ ). The inset shows the linear fitting curve.

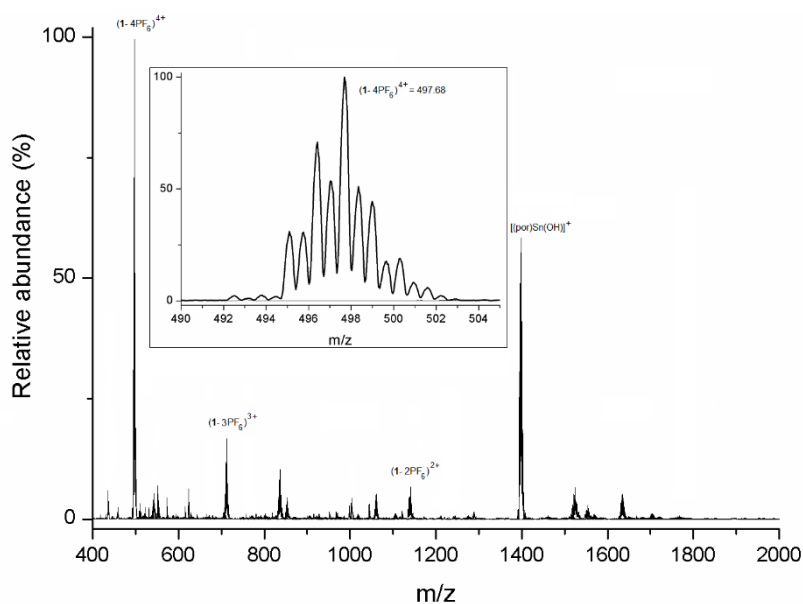

**Fig. S9** ESI-MS spectrum for **1**.



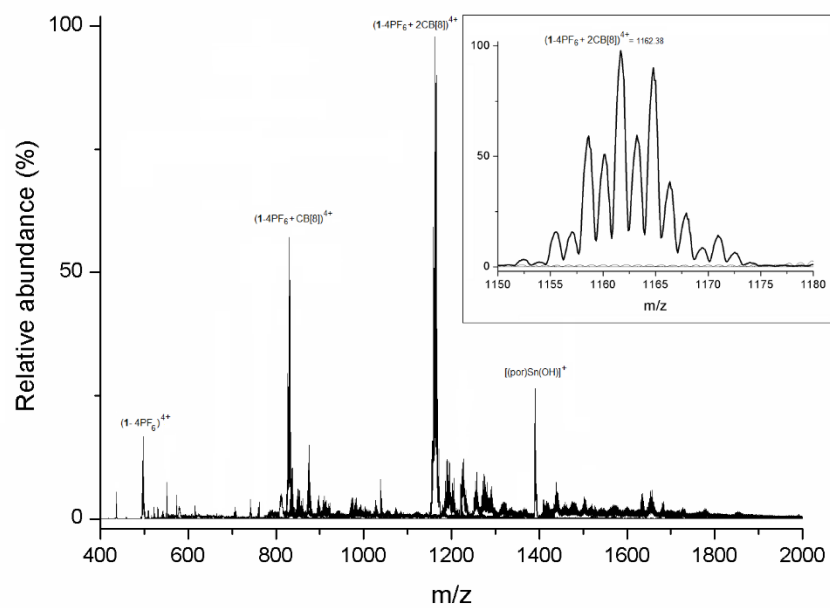

**Fig. S10** ESI-MS spectrum for the 1:2 complex of **1** and CB[8].

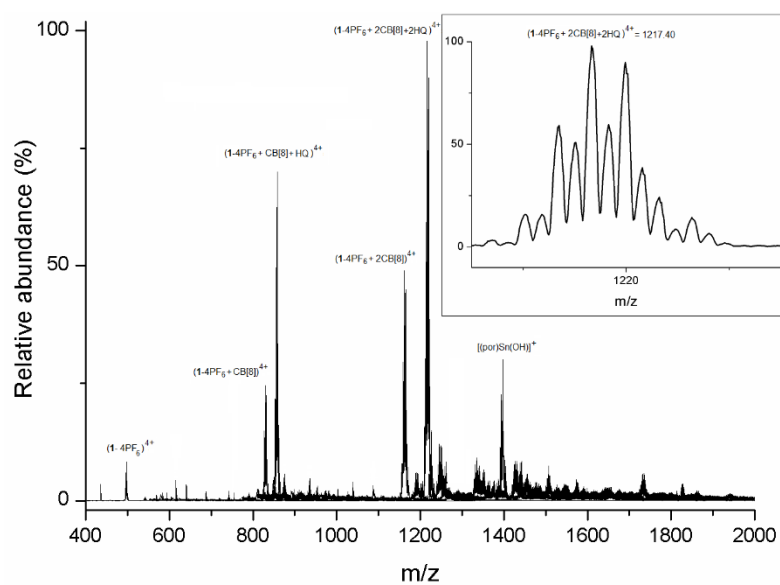

**Fig. S11** ESI-MS spectrum for the 1:2:2 complex of **1**, CB[8], and hydroquinone (HQ).
